# Supplementary material for: Bioassay Directed Isolation, Biological Evaluation and in Silico Studies of New Isolates from Pteris cretica L
Source: PubMed Central journal article supplement (PMC6680627; doi:10.3390/antiox8070231), 2019-07-19
Supplement: antioxidants-08-00231-s001.pdf [file antioxidants-08-00231-s001.pdf]

**Table S1. Detailed absorption, distribution, metabolism, toxicity and excretion in silico assessment.**

| Attributes                            | F9               | CB18                      |
|---------------------------------------|------------------|---------------------------|
| <b>Molecular Property</b>             |                  |                           |
| Mass                                  | 230.304          | 258.35                    |
| logP                                  | 2.61             | 3.39                      |
| H-bond acceptors                      | 4                | 4                         |
| H-bond donors                         | 1                | 1                         |
| Rotatable bonds                       | 10               | 11                        |
| PSA                                   | 96.98            | 109.71                    |
| Refractivity                          | 62.85            | 72.46                     |
| <b>Druglikeness</b>                   |                  |                           |
| Lipinski                              | Yes; 0 violation | Yes; 0 violation          |
| Ghose filter                          | Yes              | Yes                       |
| Veber (GSK) filter                    | Yes              | No; 1 violation: Rot > 10 |
| Egan (Pharmacia) filter               | Yes              | Yes                       |
| Muegge (Bayer) filter                 | Yes              | Yes                       |
| Abbott Bioavailability score          | 0.56             | 0.56                      |
| <b>Medicinal Chemistry (Friendly)</b> |                  |                           |
| PAINS                                 | 0 alert          | 0 alert                   |
| Brenk structural alert                | 0 alert          | 0 alert                   |
| <b>ADMET</b>                          |                  |                           |
| <b>A (Absorption)</b>                 |                  |                           |
| Water solubility                      | -1.913           | -2.73                     |
| Human Intestinal Absorption (HIA)     | 95.87            | 94.5                      |
| Human oral bioavailability (HOB)      |                  |                           |
| Caco-2 permeability                   | 0.92             | 0.89                      |
| P-glycoprotein inhibitor I/II         | No               | No                        |
| P-glycoprotein substrate              | No               | No                        |
| <b>D (Distribution)</b>               |                  |                           |
| BBB Permeability                      | Yes              | Yes                       |
| <b>M (Metabolism)</b>                 |                  |                           |
| <i>CYP Inhibitors and Substrates</i>  |                  |                           |
| CYP1A2 inhibition                     | No               | No                        |
| CYP2C19 inhibition                    | No               | No                        |
| CYP2C9 inhibition                     | No               | No                        |
| CYP2C9 substrate                      | No               | No                        |
| CYP2D6 inhibition                     | No               | No                        |
| CYP2D6 substrate                      | No               | No                        |
| CYP3A4 inhibition                     | No               | No                        |
| CYP3A4 substrate                      | No               | No                        |
| <b>E (Excretion)</b>                  |                  |                           |
| Renal Organic Cation Transporter      | -                | -                         |
| <b>T (Toxicity)</b>                   |                  |                           |
| AMES toxicity                         | No               | No                        |
| hERG I inhibitor                      | No               | No                        |
| hERG II inhibitor                     | No               | No                        |
| Hepatotoxicity                        | No               | No                        |
| Carcinogenicity                       | No               | No                        |
| Mutagenic                             | No               | No                        |
| Irritant                              | No               | No                        |
